# Supplementary material
Source: publisher figshare collection journal article supplement (https://karger.figshare.com/articles/dataset/_/17067284)

"[A] MEMOIR THAT READS LIKE A THRILLER." —NEW YORK TIMES BOOK REVIEW

STEFFANIE STRATHDEE AND THOMAS PATTERSON

# THE PERFECT PREDATOR

A MEMOIR

A SCIENTIST'S RACE TO  
SAVE HER HUSBAND  
FROM A DEADLY SUPERBUG

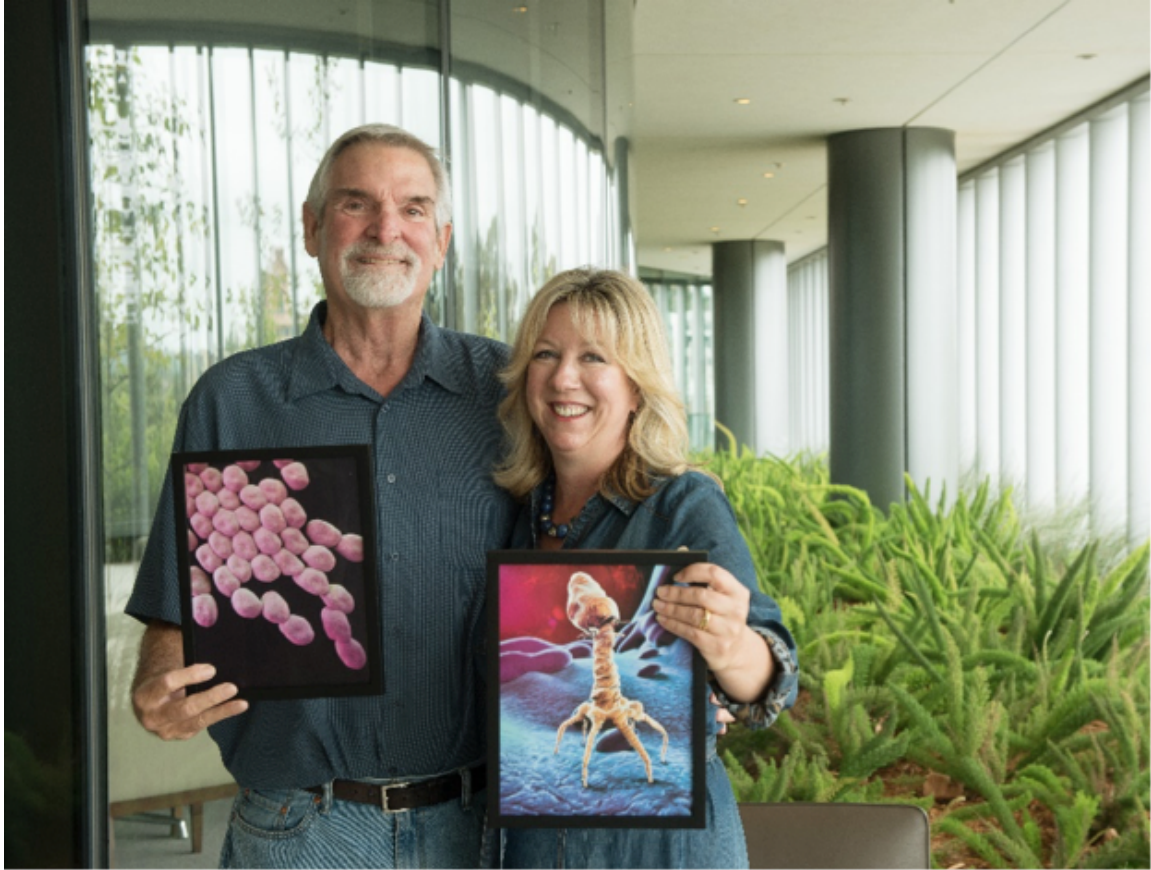

Supplement: Supplementary file 2 [file 1]
